# Supplementary material for: A Concept of Bayesian Regulation in Fisheries Management
Source: PubMed Central journal article supplement (PMC4218784; doi:10.1371/journal.pone.0111614), 2014-11-03
Supplement: pone.0111614.s002.pdf [file pone.0111614.s002.pdf]

## 1 Supporting Information - Appendix S2

2 The stochastic operating model has numbers-at-age (NAA) and weight-at-age  
 3 (WAA) as variables for age-class 1 to 8+, in which 8+ is an accumulated age-class of  
 4 eight-year-olds and older. The dynamic equations for NAA and WAA are:

$$5 \quad N_{a,y+1} = \begin{cases} R_y, & a = 1 \\ N_{a-1,y} \exp(-Z_{a-1,y}), & a = 2...7 \\ N_{a-1,y} \exp(-Z_{a-1,y}) + N_{a,y} \exp(-Z_{a-1,y}), & a = 8+ \end{cases} \quad (1)$$

$$7 \quad \bar{W}_{a,y+1} = \begin{cases} \bar{W}_{1,y}, & a = 1 \\ \bar{W}_{a-1,y} + G_{a-1,y}, & a = 2...7 \\ \frac{(\bar{W}_{a-1,y} + G_{a-1,y}) N_{a-1,y} \exp(-Z_{a-1,y}) + (\bar{W}_{a,y} + G_{a,y}) N_{a,y} \exp(-Z_{a,y})}{N_{a-1,y} \exp(-Z_{a-1,y}) + N_{a,y} \exp(-Z_{a,y})}, & a = 8+ \end{cases} \quad (2)$$

8  
 9  
 10 where  $N_{a,y}$  are numbers at age  $a$  in year  $y$ , and  $\bar{W}_{a,y}$  is the average weight-at-age on 1  
 11 January.  $R$  is a recruitment function,  $Z$  is a mortality function,  $G$  is growth function, and  
 12  $\bar{W}_{1,y}$  is how recruits are assigned their weight. The mortality,  
 13

$$14 \quad Z_{a,y} = p(qf_y^* + m_a + v_a C_y + \varepsilon_y), \quad (3)$$

15  
 16 where  $m_a$  is the age-specific baseline mortality, and  $v_a$  is the parameter for the predation in  
 17 relation to total cod biomass  $C_y$  in year  $y$  (cod being the main predator on herring in the  
 18 Baltic Sea). This and the other functions of the SOM add a stochastic normal distributed  
 19 error  $\varepsilon_{a,y}$ . Parameter  $p$  is the part of the year, in Equation (3), when the mortality rate  
 20

21 applies. Recruitment is based on the SSB where two- and three year olds have maturity  
 22 rates of 70 % and 90 % respectively, and older have 100 % maturity with no skipped  
 23 spawning [1],

24

$$25 \quad R_{y+1} = \text{SSB}_y (b + d\text{SSB}_y + \varepsilon_y), \quad (4)$$

26

27 where  $b$  and  $d$  are estimated parameters. Spawning takes place during the spring and a  
 28 partial ( $p=0.3$ ) natural mortality and body growth is used for SSB calculations. Body  
 29 growth is of the von Bertalanffy type,

30

$$31 \quad G_{a,y} = p(c + k_y + k_a + l\bar{W}_{a,y} + \varepsilon_{a,y}), \quad (5)$$

32

33 in which  $c$  is a constant,  $k_y$  the year-specific growth,  $k_a$  the age effect,  $l$  the weight-effect  
 34 parameter. The average weight of recruits is determined by the proportional contribution  
 35 from parental age-classes and the average weight-at-age of the parent female,

36

$$37 \quad \bar{W}_{1,y+1} = k \frac{\sum_{a>1} (N_{1,y}^a \bar{W}_{y,a})}{\sum_{a>1} N_{1,y}^a} + \varepsilon_y, \quad (6)$$

38

39 where  $N_{1,y}^a$  is the number of 1-year-olds from mothers aged  $a$ , and  $k$  is a proportionality  
 40 constant. Cod abundance in Equation (3) and year-specific growth in Equation (5) are  
 41 subject to normally distributed stochastic environmental noise. For more details and  
 42 parameter values see Holmgren et al. [2].

43

44

45

Reference List

46

47

48

49

1. ICES (2010) Report of the Baltic Fisheries Assessment Working Group (WGBFAS), 15 - 22 April 2010, ICES Headquarters, Copenhagen. 633 pp. ICES CM 2010/ACOM:10.

50

51

52

53

54

2. Holmgren NMA, Norrström N, Aps R, Kuikka S (2012) MSY-orientated management of Baltic Sea herring (*Clupea harengus*) during different ecosystem regimes. ICES J Mar Sci 69: 257-266.
